# Supplementary material for: Redirector: Designing Cell Factories by Reconstructing the Metabolic Objective
Source: PLoS Comput Biol. 2013 Jan 17;9(1):e1002882. doi: 10.1371/journal.pcbi.1002882 (PMC3547792; doi:10.1371/journal.pcbi.1002882)
Supplement: Table S2 — Malonyl-CoA dependency network. The double and triple metabolic alteration target dependency groups found for malonyl-CoA production are shown along with the predicted amount of production. There were no single enzymes that were found by the dependency analysis. Production indicates the amount of malonyl-CoA made by that dependency group. (XLSX) [file pcbi.1002882.s004.xlsx]

## Sheet: dependency production
Enzyme Dependency	Production*
fabD and acpP , accABCD	15.617
fabD and acpP , can or cynT , puuA or glnA	15.617
accABCD , trpAB , fabB	11.5766
accABCD , thrB, fabB	11.5766
accABCD , trpAB , fabH and acpP	11.5766
tnaA, accABCD , fabH and acpP	11.5766
tdh, accABCD , fabB	11.5766
thrA or metL or lysC , accABCD , fabB	11.5766
accABCD , cmk, fabH and acpP	11.5766
folD, accABCD , fabH and acpP	11.5766
tktA or tktB , accABCD , fabB	11.5766
accABCD , kbl, fabB	11.5766
folD, accABCD , fabB	11.5766
tnaA, accABCD , fabB	11.5766
accABCD , cmk, fabB	11.5766
glyA, accABCD , fabB	11.5764
gltA, appBC , eno	11.5764
gpmA , appBC , acnB or acnA	11.5764
eno, appBC , acnB or acnA	11.5764
gltA, appBC , gpmA	11.5764
poxB, accABCD , fabH and acpP	10.897
poxB, accABCD , fabB	10.8338
tktA or tktB , accABCD , fabH and acpP	10.3535
accABCD , appBC , fabH and acpP	10.2204
accABCD , appBC , fabB	10.1078
nuoABCEFGHIJKLMN , accABCD , fabH and acpP	10.0742
nuoABCEFGHIJKLMN , accABCD , fabB	9.9108
purB, accABCD , fabH and acpP	9.8158
purB, accABCD , fabB	9.8158
accABCD , fabH and acpP , thrA or metL or lysC	9.7292
accABCD , kbl, fabH and acpP	9.7292
tdh, accABCD , fabH and acpP	9.7292
accABCD , thrB, fabH and acpP	9.7292
accABCD , fabH and acpP , gpmA	9.6938
accABCD , fabH and acpP , eno	9.6938
accABCD , eno, fabB	9.5224
fabB, accABCD , gpmA	9.5224
sdhABCD , accABCD , fabH and acpP	9.184
gltA, accABCD , fabH and acpP	9.184
fumC or fumA or fumB , accABCD , fabH and acpP	9.184
accABCD , fabH and acpP , acnB or acnA	9.184
accABCD , pgk, fabH and acpP	9.1162
gapA, accABCD , fabH and acpP	9.1162
accABCD , gnd, fabH and acpP	9.1162
ybhE, accABCD , fabH and acpP	9.1162
accABCD , fabH and acpP , rpiA or rpiB	9.1162
talB or talA , accABCD , fabH and acpP	9.1162
glyA, accABCD , fabH and acpP	9.0291
sdhABCD , accABCD , fabB	8.9908
fabB, accABCD , acnB or acnA	8.9908
fumC or fumA or fumB , accABCD , fabB	8.9908
gltA, accABCD , fabB	8.9908
accABCD , fabH and acpP	8.9834
can or cynT , puuA or glnA , fabH and acpP	8.9834
ybhE, accABCD , fabB	8.8639
gapA, accABCD , fabB	8.8639
talB or talA , accABCD , fabB	8.8639
rpiA or rpiB , accABCD , fabB	8.8639
accABCD , pgk, fabB	8.8639
accABCD , gnd, fabB	8.8639
accABCD , fabB	8.7381
can or cynT , puuA or glnA , fabB	8.7381
gltA, poxB, gpmA	7.8408
poxB, eno, acnB or acnA	7.8408
poxB, gpmA , acnB or acnA	7.8408
gltA, poxB, eno	7.8408
poxB, aceA, tktA or tktB	6.8789
